# Supplementary material for: Red blotch disease alters grape berry development and metabolism by interfering with the transcriptional and hormonal regulation of ripening
Source: PubMed Central journal article supplement (PMC5444480; doi:10.1093/jxb/erw506), 2017-01-27

## **Red blotch disease alters grape berry development and metabolism by interfering with the transcriptional and hormonal regulation of ripening**

Barbara Blanco-Ulate, Helene Hopfer, Rosa Figueroa-Balderas, Zirou Ye, Rosa M. Rivero, Alfonso Albacete, Francisco Pérez-Alfocea, Renata Koyama, Michael M. Anderson, Rhonda J. Smith, Susan E. Ebeler, and Dario Cantu

### *Supplementary Figures*

Figure S1. Geographic location of the two vineyards in California where berry sampling was performed.

Figure S2. Scatterplots showing the correlation between the fold changes ( $\log_2$ ) in expression obtained by processing the RNAseq data with DESeq2 and the fold changes ( $\log_2$ ) measured by qRT-PCR. Relative expression was calculated using VIT\_02s0012g00910, VIT\_18s0001g00360 and VIT\_04s0044g00580 (VvActin) to choose the best performing reference gene. Linear trends, correlation coefficients ( $r$ ) and P-values are provided.

Figure S3. Viral titers in grape berries based on qPCR amplification of GRBaV DNA. Pre-v, Pre-véraison; V, véraison; Post-v, post-véraison; H, harvest. Error bars correspond to the standard error.

-123.0

-122.8

-122.6

-122.4

Longitude

Latitude 38.6

● Healdsburg

Santa Rosa

● Oakville

38.4

Napa

Petaluma

38.2

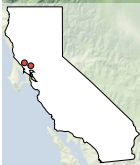

VIT\_02s0012g00910

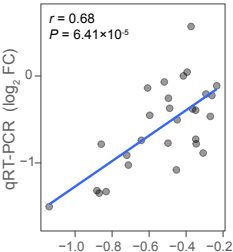

VIT\_18s0001g00360

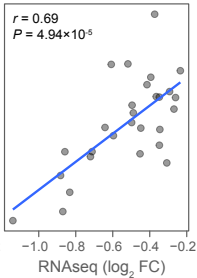

VvActin

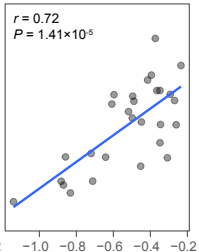

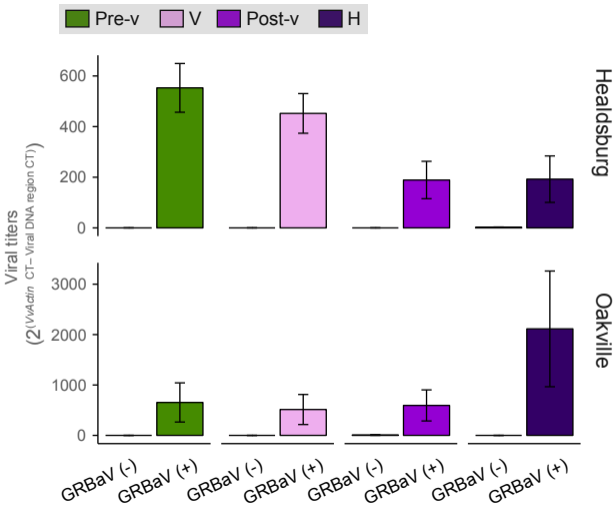

Supplement: erw506_suppl_Supplementary_Figures_S1_S3.pdf [file erw506_suppl_Supplementary_Figures_S1_S3.pdf]
